# Supplementary material for: Utilizing Biotinylated Proteins Expressed in Yeast to Visualize DNA–Protein Interactions at the Single-Molecule Level
Source: Front Microbiol. 2017 Oct 24;8:2062. doi: 10.3389/fmicb.2017.02062 (PMC5662892; doi:10.3389/fmicb.2017.02062)
Supplement: Supplementary file 7 [file DataSheet1.XLSX]

## Sheet: sheet1
ORC molecule No.	Position （kb）
1	25.8
2	28.91
3	48.21
4	27.78
5	34.74
6	40.26
7	19.14
8	27.93
9	47.12
10	25.26
11	36.41
12	46.82
13	24.03
14	38.73
15	47.81
16	10.26
17	27.19
18	41.59
19	45.74
20	25.11
21	28.67
22	47.42
23	25.11
24	27.93
25	31.82
26	25.95
27	34.14
28	47.91
29	25.36
30	37.25
31	43.17
32	47.76
33	19.14
34	25.36
35	18.6
36	26.64
37	25.9
38	29.95
39	5.77
40	23.63
41	36.22
42	48.3
43	13.82
44	27.78
45	34.09
46	38.29
47	9.92
48	13.37
49	30.34
50	40.8
51	25.76
52	25.85
53	38.39
54	48.55
55	24.67
56	2.02
57	23.39
58	31.33
59	47.02
60	24.42
61	46.63
62	26.1
63	25.36
64	26.64
65	25.46
66	37.79
67	48.01
68	14.36
69	26.2
70	31.33
71	41.05
72	47.12
73	25.51
74	29.95
75	47.32
76	14.85
77	48.8
78	27.24
79	40.46
80	37.7
81	29.95
82	24.82
83	7.55
84	23.93
85	28.37
86	46.77
87	6.91
88	27.83
89	7.89
90	23.98
91	39.18
92	47.37
93	11.55
94	24.97
95	48.35
96	25.31
97	42.14
98	25.06
99	46.68
100	48.01
101	32.47
102	37.55
103	26.05
104	37.84
105	49.04
106	47.61
107	25.26
108	40.31
109	25.06
110	8.93
111	25.06
112	38.73
113	47.96
114	39.62
115	47.22
116	24.97
117	30.1
118	25.9
119	41.45
120	48.01
121	24.97
122	48.99
123	6.27
124	27.58
125	47.12
126	12.78
127	24.82
128	25.66
129	40.16
130	48.5
131	25.8
132	48.55
133	22.25
134	28.03
135	47.71
136	36.61
137	4.44
138	19.39
139	24.97
140	29.41
141	47.96
142	25.51
143	24.03
144	48.8
145	27.73
146	25.76
147	26.59
148	26.25
149	32.61
150	47.22
151	20.53
152	36.96
153	48.6
154	23.44
155	24.37
156	28.77
157	24.37
158	33.65
159	48.06
160	26.2
161	31.28
162	24.23
163	46.68
164	25.16
165	25.11
166	27.88
167	28.17
168	41.69
169	26.59
170	47.96
171	47.71
172	25.71
173	47.27
174	48.35
175	26.15
176	38.39
177	27.38
178	49.34
179	27.14
180	48.21
181	22.99
182	38.34
183	46.77
184	49.09
185	30.54
186	26.89
187	24.47
188	47.76
189	45.74
190	26.15
191	27.14
192	41.54
193	28.12
194	48.6
195	49.04
196	48.6
197	27.78
198	26.3
199	47.51
200	26.64
201	48.3
202	24.92
203	48.55
204	26.25
205	26.4
206	26.89
207	28.03
208	24.42
209	48.21
210	48.7
211	12.98
212	48.16
213	27.14
214	48.55
215	26.54
216	49.04
217	48.65
218	48.25
219	26.74
220	48.95
221	24.92
222	48.5
223	30.39
224	49.09
225	21.27
226	39.13
227	42.78
228	25.71
229	49.04
230	47.51
231	22.25
232	27.14
233	35.03
234	49.09
235	26.1
236	48.99
237	48.7
238	25.9
239	41.54
240	26.3
241	48.21
242	27.29
243	48.21
244	49.04
245	46.77
246	27.88
247	24.08
248	46.53
249	48.99
250	25.9
251	47.02
252	47.81
253	48.65
254	26.35
255	25.31
256	27.88
257	31.48
258	48.99
259	46.43
260	48.6
261	47.47
262	25.71
263	37.79
264	24.67
265	2.07
266	10.85
267	26.74
268	4.49
269	27.93
270	48.99
271	27.83
272	40.9
273	26.35
274	48.95
275	26.3
276	42.14
277	26.25
278	48.45
279	25.71
280	48.4
281	26.69
282	49.04
283	25.9
284	32.56
285	27.29
286	46.87
287	26.64
288	25.31
289	41.05
290	26.99
291	24.87
292	29.85
293	26.25
294	49.24
295	47.02
296	27.53
297	48.6
298	29.01
299	49.24
300	26.3
301	37.65
302	47.76
303	26.05
304	34.44
305	48.95
306	5.92
307	32.47
308	48.01
309	24.92
310	41.4
311	47.51
312	29.01
313	49.19
314	31.48
315	26.3
316	26.1
317	49.04
318	12.19
319	26.3
320	48.7
321	23.58
322	47.91
323	40.66
324	26.64
325	33.9
326	25.95
327	26.3
328	41.84
329	37.84
330	22.05
331	32.56
332	41.69
333	48.99
334	25.71
335	47.96
336	25.51
337	48.25
338	25.51
339	47.91
340	29.11
341	26.89
342	47.76
